# Supplementary material for: NAIL-MS reveals the repair of 2-methylthiocytidine by AlkB in E. coli
Source: PubMed Central journal article supplement (PMC6898146; doi:10.1038/s41467-019-13565-9), 2019-12-06
Supplement: 41467_2019_13565_MOESM1_ESM.pdf [file 41467_2019_13565_MOESM1_ESM.pdf]

## Supplement

### **NAIL-MS reveals the repair of 2-methylthiocytidine by AlkB in *E. coli***

Valentin F. Reichle<sup>1</sup>, Dimitar P. Petrov<sup>2</sup>, Verena Weber<sup>1</sup>, Kirsten Jung<sup>2</sup> and Stefanie Kellner<sup>1\*</sup>

<sup>1</sup> Department of Chemistry, Ludwig-Maximilians-University Munich, Butenandtstr. 5-13, 81377 Munich, Germany

<sup>2</sup> Department of Biology, Ludwig-Maximilians-University Munich, Grosshaderner Str. 2-4, 82152 Martinsried, Germany

\* Corresponding author: stefanie.kellner@cup.lmu.de

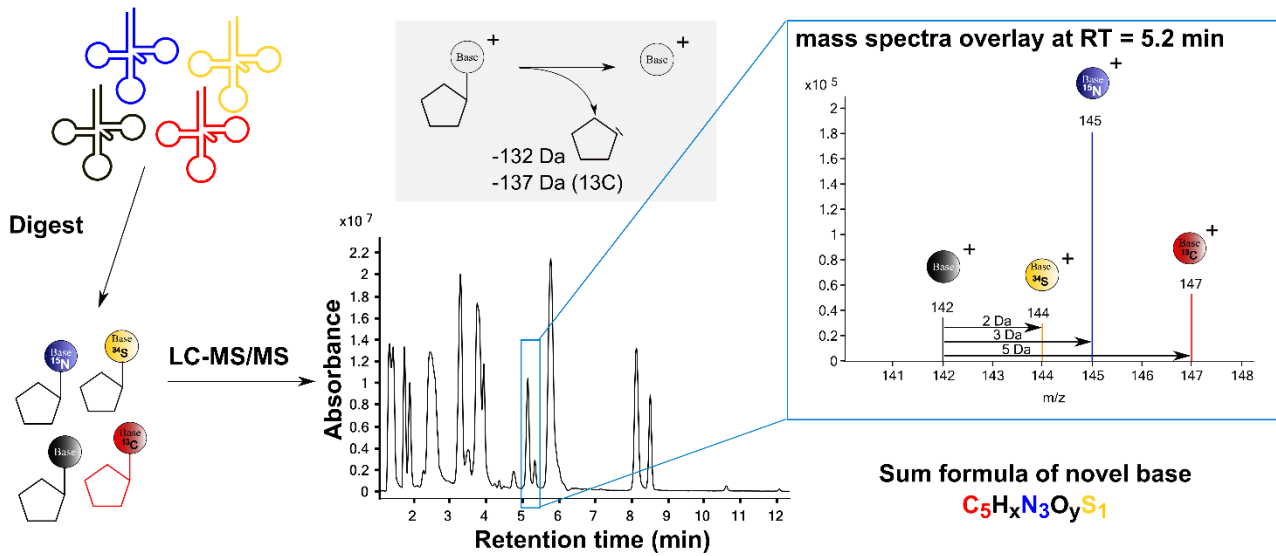

**Supplementary Figure 1:** Principle concept for the discovery of unknown nucleosides. Bacteria (*E. coli* or *P. aeruginosa*) are fed with stable isotope labeled nutrients in minimal M9 medium supplemented with glucose. The completely carbon-13 (red), nitrogen-15 (blue), sulfur-34 (yellow) or unlabeled (black) tRNAs are isolated and digested to nucleosides. Each RNA digest of isotopically labeled bacteria is analyzed by LC-MS/MS and the total ion count is displayed in the chromatogram. The mass spectra of the chromatographic peaks are isolated and overlaid for the differentially labeled samples. Here, the mass spectra overlay for the new compound  $\text{ms}^{2}\text{C}$  at retention time (RT) 5.2 min is shown.

**Supplementary Table 1a:** Parameters of Triple Quadrupole method used for the discovery of  $ms^2C$ . The difference between precursor and product ions is 132 units, the common fragmentation of nucleosides (loss of ribose). The table applies only for unlabeled, nitrogen-15 and sulfur-34 labeled RNA samples.

| Precursor Ion | Product Ion | Ret. Time | Delta Ret. | Fragmentor | Collision energy | Cell Accelerator Voltage | Polarity |
|---------------|-------------|-----------|------------|------------|------------------|--------------------------|----------|
| 240           | 108         | 10        | 20         | 250        | 40               | 2                        | positive |
| 241           | 109         | 10        | 20         | 250        | 40               | 2                        | positive |
| 242           | 110         | 10        | 20         | 250        | 40               | 2                        | positive |
| 243           | 111         | 10        | 20         | 250        | 40               | 2                        | positive |
| ..            | ..          | 10        | 20         | 250        | 40               | 2                        | positive |
| ..            | ..          | 10        | 20         | 250        | 40               | 2                        | positive |
| 419           | 287         | 10        | 20         | 250        | 40               | 2                        | positive |
| 420           | 288         | 10        | 20         | 250        | 40               | 2                        | positive |

**Supplementary Table 1b:** Parameters of Triple Quadrupole method used for the discovery of  $ms^2C$ . The difference between precursor and product ions is 137 units, which reflects the loss of a  $^{13}C_5$ -labeled ribose.

| Precursor Ion | Product Ion | Ret. Time | Delta Ret. | Fragmentor | Collision energy | Cell Accelerator Voltage | Polarity |
|---------------|-------------|-----------|------------|------------|------------------|--------------------------|----------|
| 240           | 103         | 10        | 20         | 250        | 40               | 2                        | positive |
| 241           | 104         | 10        | 20         | 250        | 40               | 2                        | positive |
| 242           | 105         | 10        | 20         | 250        | 40               | 2                        | positive |
| 243           | 106         | 10        | 20         | 250        | 40               | 2                        | positive |
| ..            | ..          | 10        | 20         | 250        | 40               | 2                        | positive |
| ..            | ..          | 10        | 20         | 250        | 40               | 2                        | positive |
| 419           | 282         | 10        | 20         | 250        | 40               | 2                        | positive |
| 420           | 283         | 10        | 20         | 250        | 40               | 2                        | positive |

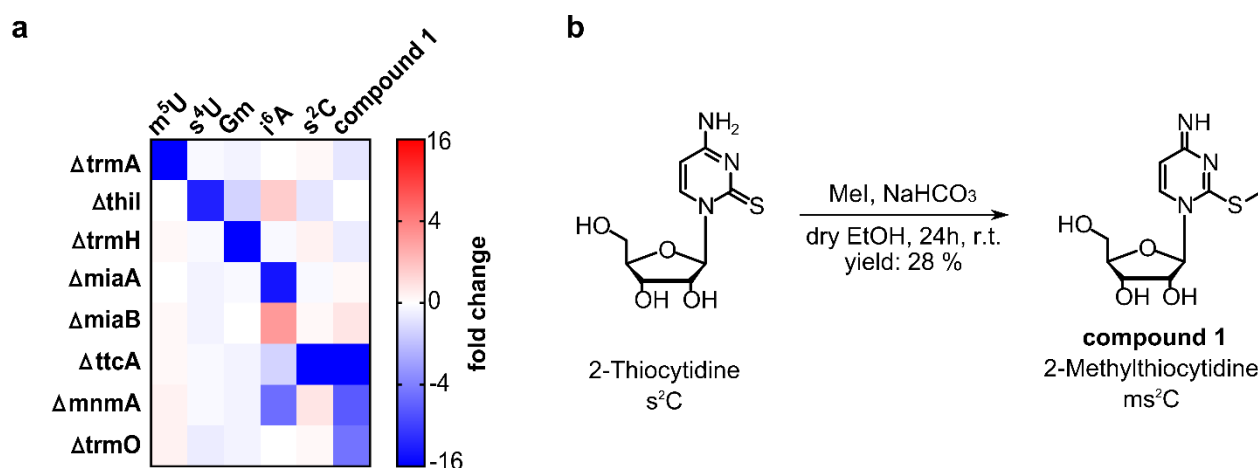

**Supplementary Figure 2:** Heatmap of *E. coli* knockout screen and synthetic route of  $ms^2C$ . **a.** tRNA from the indicated *E. coli* knockout strains was analyzed for the abundance of modified nucleosides. The found abundance is related to the abundance found in wildtype BW25113 strain. Compound 1 is  $ms^2C$ . Blue: Lower abundance compared to wildtype. Red: Higher abundance compared to the wildtype. **b.** Synthetic pathway and conditions of the synthesis from  $s^2C$  to  $ms^2C$  under usage of methyl iodide.

**Supplementary Table 2:** *E. coli* knockouts used for RNA modification screening in **Supplementary Figure 2** and **6**. Reference: Keio collection.<sup>1</sup>

| Keio code number | knockout gene | Enzyme | Mod. suppression |
|------------------|---------------|--------|------------------|
| BW25113          | -             | -      | -                |
| JW3937-KC        | trmA          | TrmA   | $m^5U$           |
| JW0413-KC        | thil          | Thil   | $s^4U$           |
| JW3626-KC        | trmH          | TrmH   | Gm               |
| JW4129-KC        | miaA          | MiaA   | $i^6A$           |
| JW0658-KC        | miaB          | MiaB   | $ms^2i^6A$       |
| JW1338-KC        | ttcA/ydaO     | TtcA   | $s^2C$           |
| JW1119-KC        | mnmA          | MnmA   | $s^2U$           |
| JW0191-KC        | trmO/yaeB     | TrmO   | $m^6t^6A$        |
| JW2501-KC        | yfgB          | RlmN   | $m^2A$           |
| JW2762-KC        | yqcB          | TruC   | Psi              |
| JW0396-KC        | tgt           | TGT    | Q                |
| JW2459-KC        | tmcA/ypfl     | TmcA   | $ac^4C$          |
| JW2559-KC        | trmN6/yfiC    | TrmN6  | $m^6A$           |
| JW3228-KC        | dusB          | DusB   | D                |

**Supplementary Table 3:** MRM parameters for LC-MS/MS analysis of unlabeled tRNA digests (*E.g.* for isoacceptor purification analysis or knockout library analysis of).

| Compound Group | Compound Name | Precursor Ion (m/z) | Product Ion (m/z) | Ret Time (min) | Delta Ret Time (min) | Fragmentor (V) | Collision Energy (eV) | Cell Accelerator Voltage (V) | Polarity |
|----------------|---------------|---------------------|-------------------|----------------|----------------------|----------------|-----------------------|------------------------------|----------|
| unlabeled      | C             | 244                 | 112               | 1.73           | 1                    | 175            | 13                    | 5                            | Positive |
|                | U             | 245                 | 113               | 2              | 1                    | 95             | 5                     | 5                            | Positive |
|                | G             | 284                 | 152               | 3.718          | 3                    | 95             | 17                    | 5                            | Positive |
|                | A             | 268                 | 136               | 5.711          | 1                    | 110            | 21                    | 5                            | Positive |
|                | s2C           | 260                 | 128               | 2.5            | 2                    | 85             | 13                    | 5                            | Positive |
|                | ms2C          | 274                 | 142               | 5.533          | 3                    | 85             | 13                    | 5                            | Positive |
|                | s4U           | 261                 | 129               | 4.753          | 1                    | 75             | 17                    | 5                            | Positive |
|                | Gm            | 298                 | 152               | 5.133          | 1                    | 100            | 9                     | 5                            | Positive |
|                | Cm            | 258                 | 112               | 3.347          | 3                    | 180            | 9                     | 5                            | Positive |
|                | I             | 269                 | 137               | 3.556          | 1                    | 100            | 9                     | 5                            | Positive |
|                | m2A           | 282                 | 150               | 8.08           | 1                    | 125            | 21                    | 5                            | Positive |
|                | m1G           | 298                 | 166               | 5.08           | 1                    | 105            | 13                    | 5                            | Positive |
|                | t6A           | 413                 | 281               | 7.19           | 1                    | 130            | 9                     | 5                            | Positive |
|                | m7G           | 298                 | 166               | 2.021          | 2                    | 105            | 14                    | 5                            | Positive |
|                | acp3U         | 346                 | 214               | 1.744          | 2                    | 180            | 20                    | 5                            | Positive |
|                | m5U           | 259                 | 127               | 3.915          | 1                    | 145            | 10                    | 5                            | Positive |
|                | Psi           | 245                 | 209               | 1.49           | 1                    | 90             | 5                     | 5                            | Positive |
| i6A            | 336           | 204                 | 14.134            | 1              | 140                  | 17             | 5                     | Positive                     |          |
| SILIS          | C SILIS       | 256                 | 119               | 1.73           | 1                    | 175            | 13                    | 5                            | Positive |
|                | U SILIS       | 256                 | 119               | 2              | 1                    | 95             | 5                     | 5                            | Positive |
|                | G SILIS       | 299                 | 162               | 3.718          | 3                    | 95             | 17                    | 5                            | Positive |
|                | A SILIS       | 283                 | 146               | 5.711          | 1                    | 110            | 21                    | 5                            | Positive |
|                | s2C SILIS     | 272                 | 135               | 2.5            | 2                    | 85             | 13                    | 5                            | Positive |
|                | ms2C SILIS    | 287                 | 150               | 5.533          | 3                    | 85             | 13                    | 5                            | Positive |
|                | s4U SILIS     | 272                 | 135               | 4.753          | 1                    | 75             | 17                    | 5                            | Positive |
|                | Gm SILIS      | 314                 | 162               | 5.133          | 1                    | 100            | 9                     | 5                            | Positive |
|                | Cm SILIS      | 271                 | 119               | 3.347          | 3                    | 180            | 9                     | 5                            | Positive |
|                | I SILIS       | 283                 | 146               | 3.556          | 1                    | 100            | 9                     | 5                            | Positive |
|                | m2A SILIS     | 298                 | 161               | 8.08           | 1                    | 125            | 21                    | 5                            | Positive |
|                | m1G SILIS     | 314                 | 177               | 5.08           | 1                    | 105            | 13                    | 5                            | Positive |
|                | t6A SILIS     | 434                 | 297               | 7.19           | 1                    | 130            | 9                     | 5                            | Positive |
|                | m7G SILIS     | 314                 | 177               | 2.021          | 2                    | 105            | 14                    | 5                            | Positive |
|                | acp3U SILIS   | 362                 | 225               | 1.744          | 2                    | 180            | 20                    | 5                            | Positive |
|                | m5U SILIS     | 271                 | 134               | 3.915          | 1                    | 145            | 10                    | 5                            | Positive |
|                | Psi SILIS     | 256                 | 220               | 1.49           | 1                    | 90             | 5                     | 5                            | Positive |
| i6A SILIS      | 356           | 219                 | 14.134            | 1              | 140                  | 17             | 5                     | Positive                     |          |

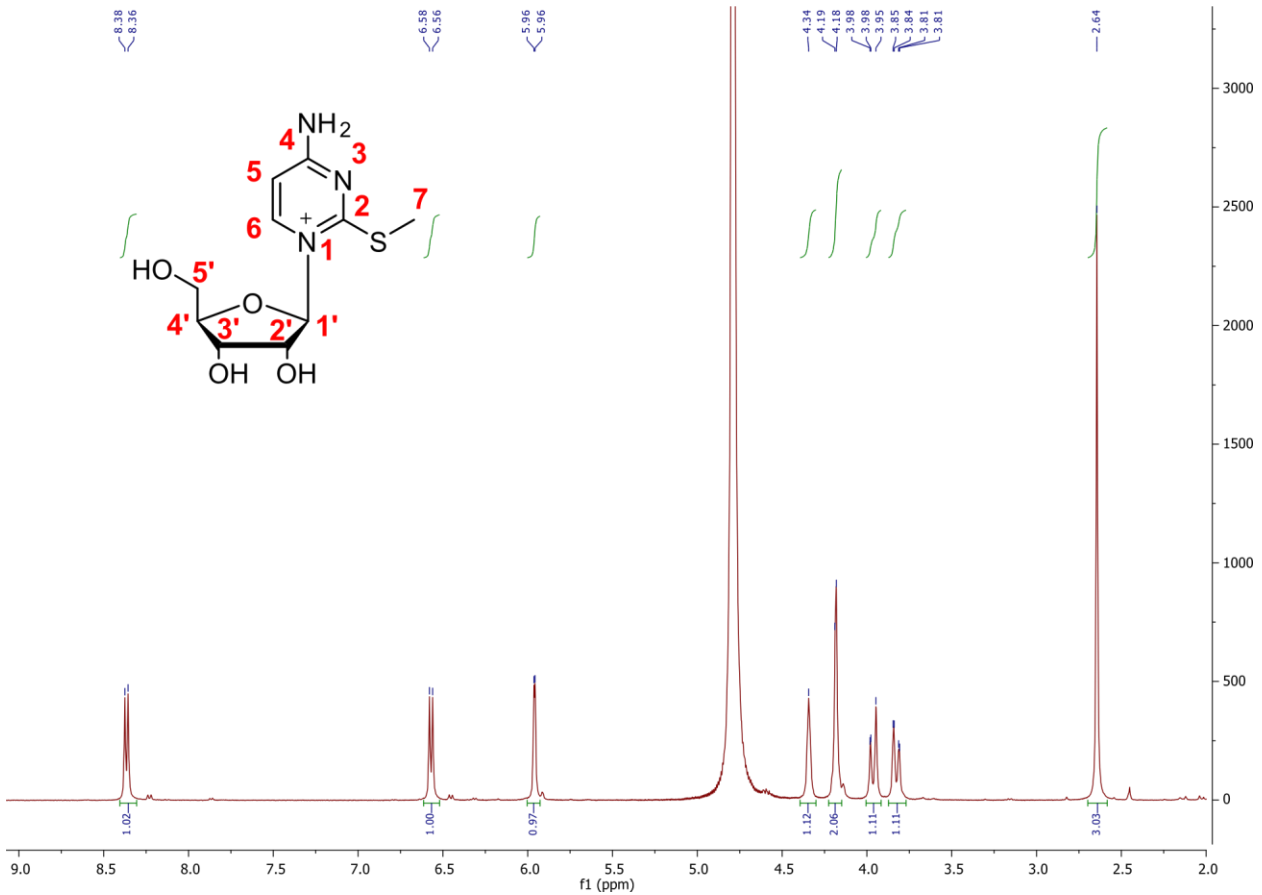

**Supplementary Figure 3:** 400 MHz  $^1\text{H}$ -NMR spectrum of 2-methylthiocytidine in  $\text{D}_2\text{O}$ .

### $\text{ms}^2\text{C}$ coinjection with *Pseudomonas aeruginosa* tRNA

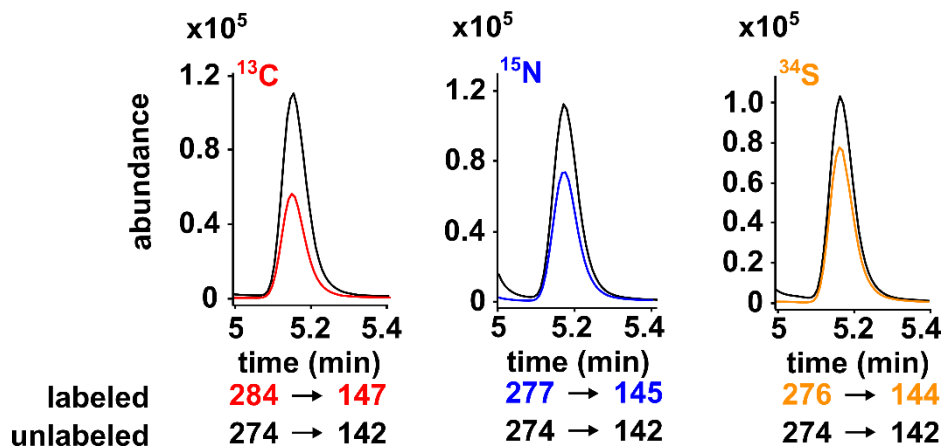

**Supplementary Figure 4:** Co-injection of synthetic  $\text{ms}^2\text{C}$  with digested and isotope labeled *P. aeruginosa* tRNA (grown in the indicated isotope labeled M9 medium).  $\text{ms}^2\text{C}$  was co-injected with fully  $^{13}\text{C}$  labeled tRNA digest (red), with fully  $^{15}\text{N}$  labeled tRNA digest (blue) and with  $^{34}\text{S}$  labeled digest (orange). The mass transitions are shown below each chromatogram.

**Supplementary Table 4:** DNA oligonucleotides for tRNA isoacceptor purification. Every sequence starts with a Biotin [Btn]-tag, followed by three adenines as a spacer before the actual reverse complementary sequence starts.

| tRNA isoacceptor                           | Sequence of the probe (5'-3')                                                  |
|--------------------------------------------|--------------------------------------------------------------------------------|
| tRNA <sup>Arg</sup> <sub>CCG</sub> :       | [Btn]AAAGAGACCTCTGCCTCCGGAGGGCAGCGCTCTATCCAGCTGAGCTA                           |
| tRNA <sup>Arg</sup> <sub>ICG</sub> :       | [Btn]AAACCGACCGCTCGGTTCTAGCCGAGTACTCTACCAGCTGAGCTAC                            |
| tRNA <sup>Arg</sup> <sub>UCU</sub> :       | [Btn]AAAGCGGCCACGACTTAGAAGGTCGTTGCTCTATCCAAGTCTGAGCTA                          |
| tRNA <sup>Ser</sup> <sub>GCU</sub> :       | [Btn]AAACCCGGATGCAGCTTTTGACCGCATACTCCCTTAGCAGGGGAGC                            |
| tRNA <sup>Ser</sup> <sub>GGA</sub> :       | [Btn]AAACCCCGATACGTTGCCGTATACACTTTCCAGGCGTGCTCCTT                              |
| tRNA <sup>Ser</sup> <sub>UGA</sub> :       | [Btn]AAATGGCGGAAGCGCAGAGATTGAACTCTGGAACCCTTTCGGGTCGCCGTTTCAAG                  |
| tRNA <sup>Ala</sup> <sub>UGC</sub> :       | [Btn]AAATGGTGGAGCTATGCGGGATCGAACCGCAGACCTCCTGCGTGCA                            |
| tRNA <sup>Gly</sup> <sub>CCC</sub> :       | [Btn]AAATGGAGCGGGCGAAGGGAATCGAACCTCGTATAGAGCTTGGGAAGCTCTCGTTCTACCGAACTACGCCCGC |
| tRNA <sup>Lys</sup> <sub>mnm5s2UUU</sub> : | [Btn]AAATGGTGGGTCGTGCAGGATTCGAACCTGCGACCAATTGATTA                              |

**Supplementary Table 5:** Modified nucleosides and their positions in the respective tRNA sequence of each isoacceptor related to this work. Reference: MODOMICS <sup>2</sup>

| Modification/<br>Isoacceptor | Modifications and their positions in the respective tRNA sequence |    |            |                  |    |         |                    |                  |                                   |                    |                  |                                  |                  |                    |                   |                  |        |
|------------------------------|-------------------------------------------------------------------|----|------------|------------------|----|---------|--------------------|------------------|-----------------------------------|--------------------|------------------|----------------------------------|------------------|--------------------|-------------------|------------------|--------|
|                              | s <sup>4</sup> U                                                  | Gm | D          | s <sup>2</sup> C | Cm | Inosine | mnm <sup>5</sup> U | m <sup>1</sup> G | mnm <sup>5</sup> s <sup>2</sup> U | cmo <sup>5</sup> U | m <sup>2</sup> A | ms <sup>2</sup> i <sup>6</sup> A | m <sup>7</sup> G | acp <sup>3</sup> U | ct <sup>6</sup> A | m <sup>5</sup> U | Psi    |
| Arg CCG                      | x                                                                 | x  | 17, 20A    | 32               | x  | x       | x                  | 37               | x                                 | x                  | x                | x                                | 46               | x                  | x                 | 54               | 55     |
| Arg ICG                      | 8                                                                 | x  | 17, 20A    | 32               | x  | 34      | x                  | x                | x                                 | x                  | 37               | x                                | 46               | 47                 | x                 | 54               | 55     |
| Arg UCU                      | x                                                                 | x  | x          | 32               | x  | x       | 34                 | x                | x                                 | x                  | x                | x                                | x                | x                  | 37                | 54               | 40, 55 |
| Ser GCU                      | 8                                                                 | x  | 20         | 32               | x  | x       | x                  | x                | x                                 | x                  | x                | x                                | x                | x                  | 37                | 54               | 55     |
| Ser GGA                      | 8                                                                 | 18 | 20, 20A    | x                | x  | x       | x                  | x                | x                                 | x                  | x                | x                                | x                | x                  | x                 | 54               | 40, 55 |
| Ser UGA                      | 8                                                                 | 18 | 20, 20A    | x                | 32 | x       | x                  | x                | x                                 | 34                 | x                | 37                               | x                | x                  | x                 | 54               | 55     |
| Ala UGC                      | 8                                                                 | x  | 17         | x                | x  | x       | x                  | x                | x                                 | 34                 | x                | x                                | 46               | x                  | x                 | 54               | 55     |
| Gly CCC                      | 8                                                                 | x  | 20         | x                | x  | x       | x                  | x                | x                                 | x                  | x                | x                                | x                | x                  | x                 | 54               | 55     |
| Lys UUU                      | x                                                                 | x  | 16, 17, 20 | x                | x  | x       | x                  | x                | 34                                | x                  | x                | x                                | 46               | 47                 | 37                | 54               | 39, 55 |

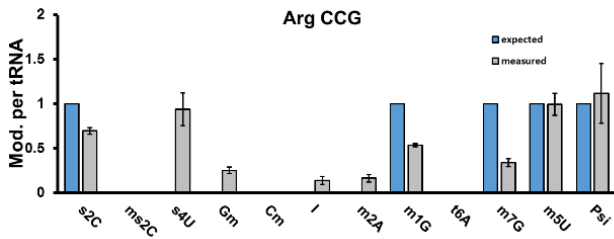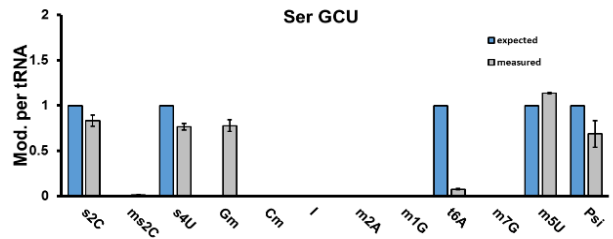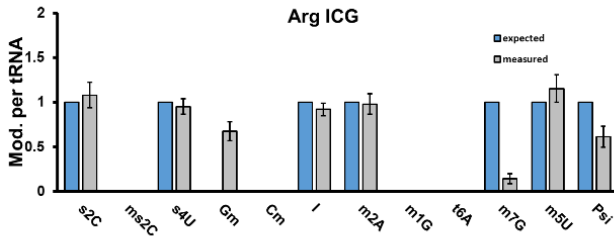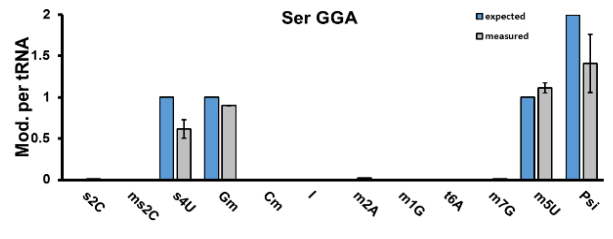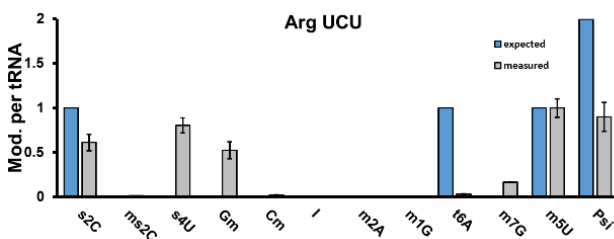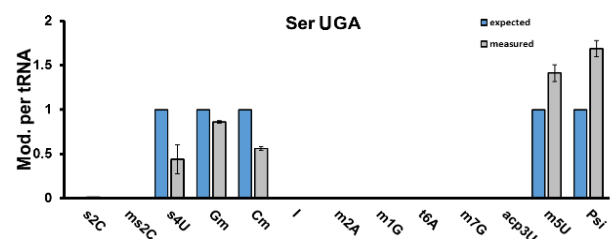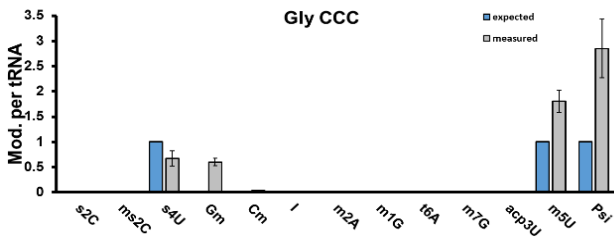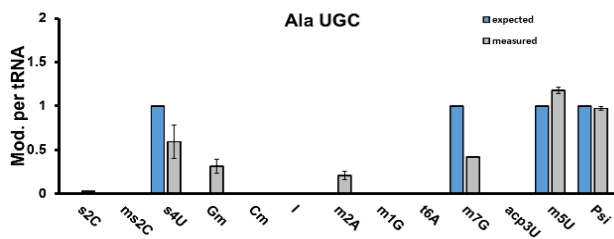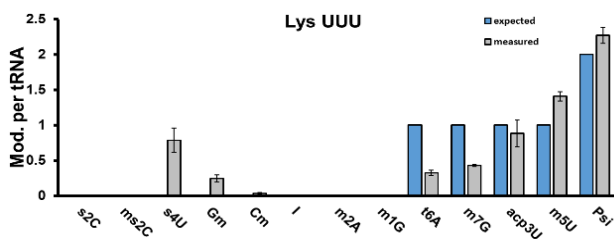

**Supplementary Figure 5:** Validation of tRNA isoacceptor purification by modified nucleoside analysis. Expected (blue, from MODOMICS)<sup>2</sup> and experimentally determined abundance of modified nucleosides per tRNA. *E.coli* was grown in LB medium. From n=3 biol. replicates, error bars reflect standard deviation. Source data are provided as a Source Data file.



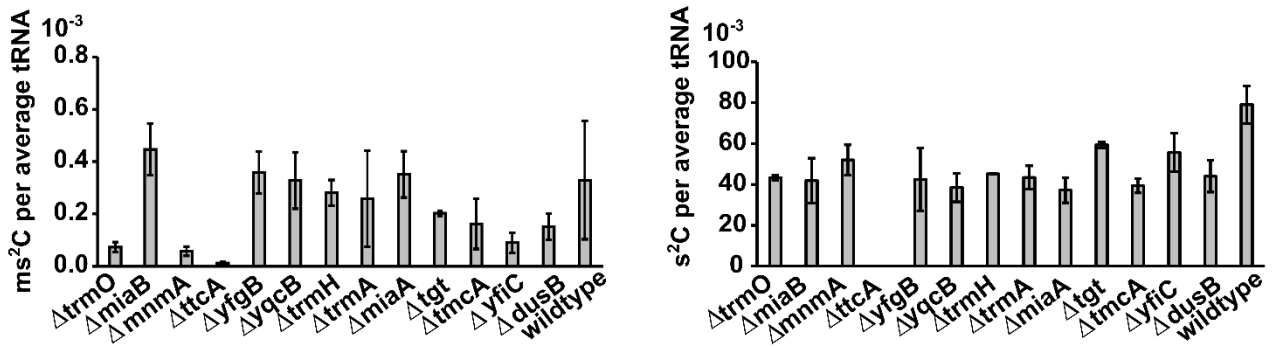

**Supplementary Figure 6:** *E. coli* knockout studies in M9 medium **Left:**  $ms^2C$  abundance in different *E. coli* RNA modification knockouts during stationary growth phase in M9 media. **Right:**  $s^2C$  abundance in different *E. coli* RNA modification knockouts during stationary growth phase in M9 media. All experiments are from n=3 biol. replicates and error bars reflect standard deviation. Source data are provided as a Source Data file.

**Supplementary Table 6:** *E. coli* overexpression strains used for RNA modification screening in **Supplementary Figure 7**. Reference: ASKA library<sup>3</sup>

| ASKA code number | overexpressed | Enzyme       | Modification |
|------------------|---------------|--------------|--------------|
| AG1 (ME5305)     | -             | -            | -            |
| AG1 (pCA24N-gfp) | -             | empty vector | -            |
| JW3228-AP        | dusB          | DusB         | D            |
| JW0396-AP        | tgt           | Tgt          | Q            |
| JW1119-AP        | mnmA          | MnmA         | $s^2C$       |
| JW0191-AP        | tsaA/yaeB     | TrmO         | $m^6t^6A$    |
| JW2559-AP        | trmN6/yfiC    | TrmN6        | $m^6A$       |

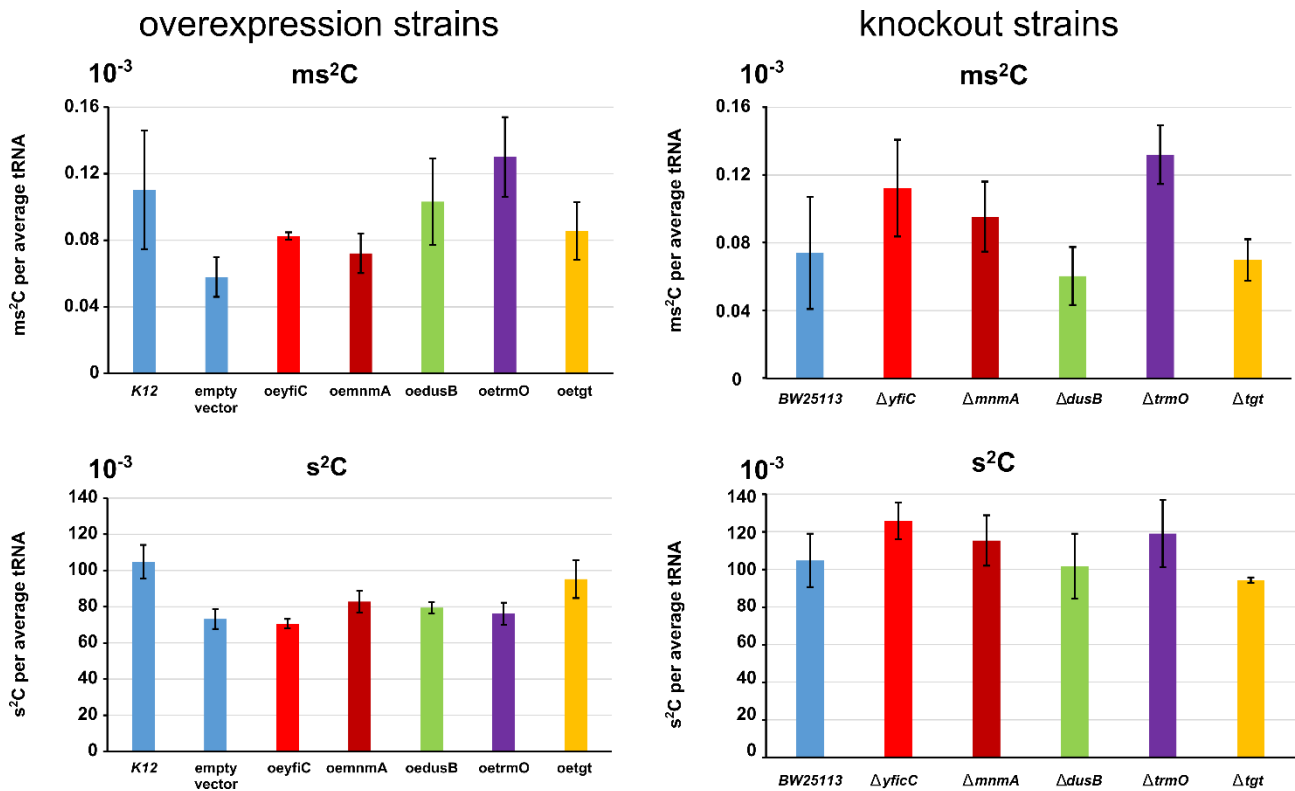

**Supplementary Figure 7:**  $ms^2C$  and  $s^2C$  abundance of *E. coli* knockouts and corresponding overexpression strains which showed low  $ms^2C$  abundance in M9 media before (Supplementary Figure 6). Here, they were cultured in LB media and harvested in exponential growth phase. As a control, the wildtype strains and the wildtype with the empty overexpressing gene vector are shown as well. The assumption of enzyme dependent  $ms^2C$  formation could not be confirmed. All experiments are from  $n=3$  biol. replicates and error bars reflect standard deviation. Source data are provided as a Source Data file.

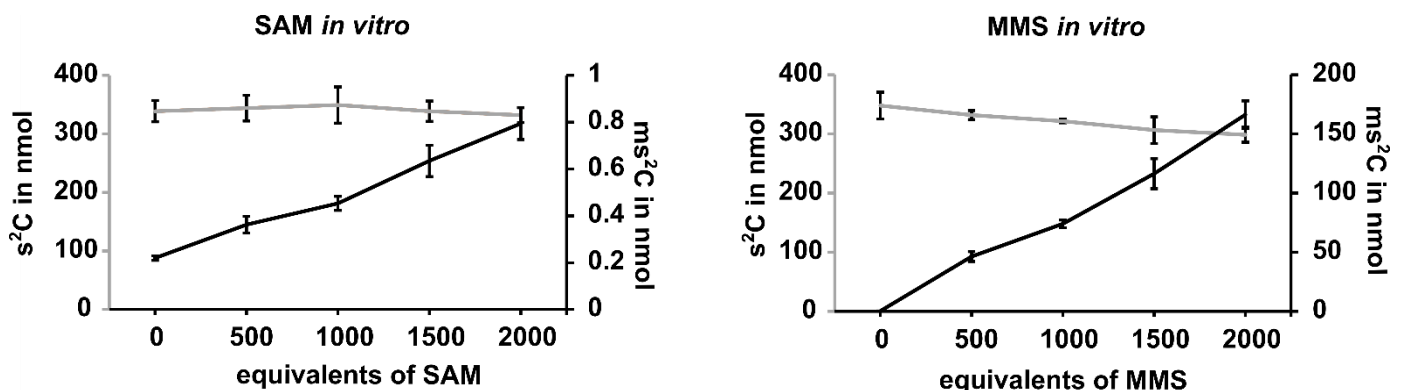

**Supplementary Figure 8:** *in vitro* incubation assay of  $s^2C$  with SAM and MMS. SAM: S-adenosylmethionine. MMS: Methyl-methanesulfonate. Grey axes and curve: abundance  $s^2C$ . Black axes and curve: abundance  $ms^2C$ . The experiments were done in triplicates and the error bars reflect standard deviation. Source data are provided as a Source Data file.

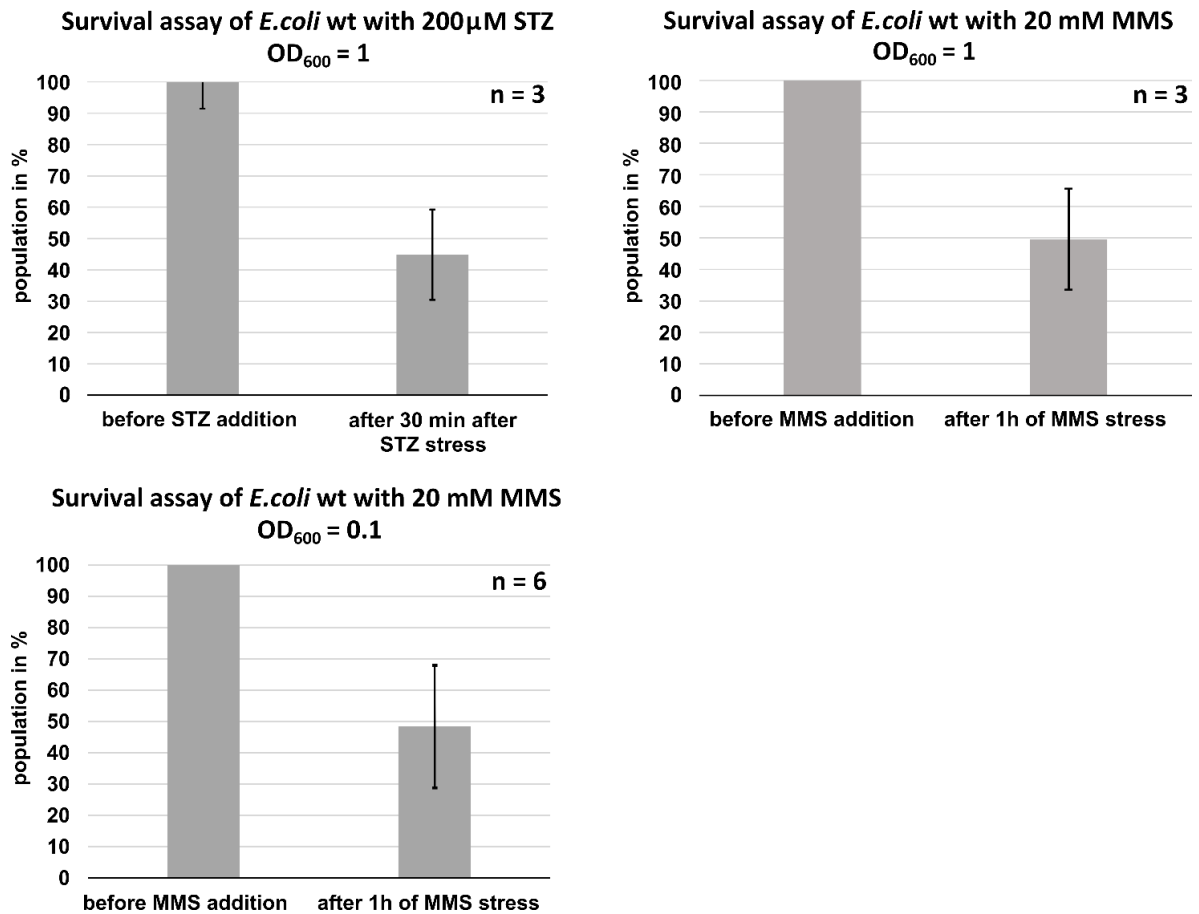

**Supplementary Figure 9:** Survival assay to determine the LD<sub>50</sub> of MMS and Streptozotocin (STZ) for the *E. coli* strain BW25113. Cells were brought to either OD<sub>600</sub> = 1 (top graphs, error bars reflect the standard deviation of n=3 biol. replicates) or OD<sub>600</sub> = 0.1 (left bottom graph, error bars reflect the standard deviation of n=6 biol. replicates) and exposed to 200 μM STZ for 30 min. (left top graph) or 20 mM MMS for 60 min. (right top graph and left bottom graph).

**Supplementary Table 7:** MRM parameters for RNA methylome discrimination assay.

| Compound Group | Compound Name | Precursor Ion (m/z) | Product Ion (m/z) | Ret Time (min) | Delta Ret Time (min) | Fragmentor (V) | Collision Energy (eV) | Cell Accelerator Voltage (V) | Polarity |
|----------------|---------------|---------------------|-------------------|----------------|----------------------|----------------|-----------------------|------------------------------|----------|
| unlabeled      | C             | 244                 | 112               | 1.73           | 1                    | 380            | 40                    | 5                            | Positive |
|                | U             | 245                 | 113               | 1.876          | 1                    | 380            | 40                    | 5                            | Positive |
|                | G             | 284                 | 152               | 3.718          | 3                    | 380            | 40                    | 5                            | Positive |
|                | A             | 268                 | 136               | 5.711          | 1                    | 380            | 40                    | 5                            | Positive |
|                | ms2C          | 274                 | 142               | 5.533          | 3                    | 380            | 40                    | 5                            | Positive |
|                | m1A           | 282                 | 150               | 1.745          | 2                    | 380            | 10                    | 5                            | Positive |
|                | m3C           | 258                 | 126               | 1.752          | 1                    | 380            | 10                    | 5                            | Positive |
|                | i6A           | 336                 | 204               | 14.134         | 1                    | 380            | 10                    | 5                            | Positive |
|                | m7G           | 298                 | 166               | 2.021          | 2                    | 380            | 10                    | 5                            | Positive |
|                | m6A           | 282                 | 150               | 8.423          | 1                    | 380            | 10                    | 5                            | Positive |
|                | m2G           | 298                 | 166               | 5.491          | 2                    | 380            | 10                    | 5                            | Positive |
|                | m3U           | 259                 | 127               | 4.696          | 2                    | 380            | 10                    | 5                            | Positive |
|                | m5C           | 258                 | 126               | 2.702          | 2                    | 380            | 10                    | 5                            | Positive |
|                | m2A           | 282                 | 150               | 8.08           | 1                    | 380            | 10                    | 5                            | Positive |
|                | Gm            | 298                 | 152               | 5.133          | 1                    | 380            | 10                    | 5                            | Positive |
|                | m1G           | 298                 | 166               | 5.08           | 1                    | 380            | 10                    | 5                            | Positive |
|                | m5U           | 259                 | 127               | 3.915          | 1                    | 380            | 10                    | 5                            | Positive |
|                | ac4c          | 286                 | 154               | 5.538          | 2                    | 380            | 10                    | 5                            | Positive |
|                | cmnm5U        | 332                 | 200               | 1.586          | 1                    | 380            | 10                    | 5                            | Positive |
|                | l             | 269                 | 137               | 3.556          | 1                    | 380            | 10                    | 5                            | Positive |
|                | Cm            | 258                 | 112               | 3.347          | 3                    | 380            | 10                    | 5                            | Positive |
|                | m5s2U         | 275                 | 143               | 6.172          | 2                    | 380            | 10                    | 5                            | Positive |
|                | Am            | 282                 | 136               | 7.257          | 1                    | 380            | 10                    | 5                            | Positive |
|                | Psi           | 245                 | 209               | 1.49           | 1                    | 380            | 10                    | 5                            | Positive |
| s4U            | 261           | 129                 | 4.753             | 1              | 380                  | 10             | 5                     | Positive                     |          |
| Um             | 259           | 113                 | 4.49              | 1              | 380                  | 10             | 5                     | Positive                     |          |
| ms2i6A         | 382           | 250                 | 10                | 20             | 380                  | 10             | 5                     | Positive                     |          |
| s2C            | 260           | 128                 | 2.288             | 1              | 380                  | 10             | 5                     | Positive                     |          |
| t6A            | 413           | 281                 | 7.553             | 1              | 380                  | 10             | 5                     | Positive                     |          |
| mn5U           | 288           | 156                 | 1.491             | 1              | 380                  | 10             | 5                     | Positive                     |          |
| CD3 labeled    | ms2C CD3      | 277                 | 145               | 5.533          | 3                    | 380            | 40                    | 5                            | Positive |
|                | m1A CD3       | 285                 | 153               | 1.745          | 2                    | 380            | 10                    | 5                            | Positive |
|                | m3C CD3       | 261                 | 129               | 1.752          | 1                    | 380            | 10                    | 5                            | Positive |
|                | m7G CD3       | 301                 | 169               | 2.021          | 2                    | 380            | 10                    | 5                            | Positive |
|                | m6A CD3       | 285                 | 153               | 8.423          | 1                    | 380            | 10                    | 5                            | Positive |
|                | m2G CD3       | 301                 | 169               | 5.491          | 2                    | 380            | 10                    | 5                            | Positive |
|                | m3U CD3       | 262                 | 130               | 4.696          | 2                    | 380            | 10                    | 5                            | Positive |
|                | m5C CD3       | 261                 | 129               | 2.702          | 2                    | 380            | 10                    | 5                            | Positive |
|                | m2A CD3       | 285                 | 153               | 8.08           | 1                    | 380            | 10                    | 5                            | Positive |
|                | Gm CD3        | 301                 | 152               | 5.133          | 1                    | 380            | 10                    | 5                            | Positive |
|                | m1G CD3       | 301                 | 169               | 5.08           | 1                    | 380            | 10                    | 5                            | Positive |
|                | m5U CD3       | 262                 | 130               | 3.915          | 1                    | 380            | 10                    | 5                            | Positive |
|                | Cm CD3        | 261                 | 112               | 3.347          | 3                    | 380            | 10                    | 5                            | Positive |
|                | m5s2U CD3     | 278                 | 146               | 6.172          | 2                    | 380            | 10                    | 5                            | Positive |
|                | Am CD3        | 285                 | 136               | 7.257          | 1                    | 380            | 10                    | 5                            | Positive |
|                | Um CD3        | 262                 | 113               | 4.49           | 1                    | 380            | 10                    | 5                            | Positive |
|                | ms2i6A CD3    | 385                 | 253               | 10             | 20                   | 380            | 10                    | 5                            | Positive |
|                | mn5U CD3      | 291                 | 159               | 1.428          | 1                    | 380            | 10                    | 5                            | Positive |

|             |              |     |       |        |     |     |            |            |
|-------------|--------------|-----|-------|--------|-----|-----|------------|------------|
| SILIS       | C SILIS      | 256 | 119   | 1.73   | 1   | 380 | 40         | 5 Positive |
|             | U SILIS      | 256 | 119   | 1.876  | 1   | 380 | 40         | 5 Positive |
|             | G SILIS      | 299 | 162   | 3.718  | 3   | 380 | 40         | 5 Positive |
|             | A SILIS      | 283 | 146   | 5.711  | 1   | 380 | 40         | 5 Positive |
|             | ms2C SILIS   | 287 | 150   | 5.533  | 3   | 380 | 40         | 5 Positive |
|             | m1A SILIS    | 298 | 161   | 1.745  | 2   | 380 | 10         | 5 Positive |
|             | m3C SILIS    | 271 | 134   | 1.752  | 1   | 380 | 10         | 5 Positive |
|             | i6A SILIS    | 356 | 219   | 14.134 | 1   | 380 | 10         | 5 Positive |
|             | m7G SILIS    | 314 | 177   | 2.021  | 2   | 380 | 10         | 5 Positive |
|             | m6A SILIS    | 298 | 161   | 8.423  | 1   | 380 | 10         | 5 Positive |
|             | m2G SILIS    | 312 | 175   | 5.491  | 2   | 380 | 10         | 5 Positive |
|             | m3U SILIS    | 271 | 134   | 4.696  | 2   | 380 | 10         | 5 Positive |
|             | m5C SILIS    | 271 | 134   | 2.702  | 2   | 380 | 10         | 5 Positive |
|             | m2A SILIS    | 298 | 161   | 8.08   | 1   | 380 | 10         | 5 Positive |
|             | Gm SILIS     | 314 | 162   | 5.133  | 1   | 380 | 10         | 5 Positive |
|             | m1G SILIS    | 314 | 177   | 5.08   | 1   | 380 | 10         | 5 Positive |
|             | m5U SILIS    | 271 | 134   | 3.915  | 1   | 380 | 10         | 5 Positive |
|             | ac4c SILIS   | 300 | 163   | 5.538  | 2   | 380 | 10         | 5 Positive |
|             | cmnm5U SILIS | 347 | 210   | 1.586  | 1   | 380 | 10         | 5 Positive |
|             | I SILIS      | 283 | 146   | 3.556  | 1   | 380 | 10         | 5 Positive |
|             | Cm SILIS     | 271 | 119   | 3.347  | 3   | 380 | 10         | 5 Positive |
|             | m5s2U SILIS  | 287 | 150   | 6.172  | 2   | 380 | 10         | 5 Positive |
|             | Am SILIS     | 298 | 146   | 7.257  | 1   | 380 | 10         | 5 Positive |
|             | Psi SILIS    | 256 | 220   | 1.49   | 1   | 380 | 10         | 5 Positive |
|             | s4U SILIS    | 272 | 135   | 4.753  | 1   | 380 | 10         | 5 Positive |
|             | Um SILIS     | 271 | 119   | 4.49   | 1   | 380 | 10         | 5 Positive |
|             | ms2i6A SILIS | 403 | 266   | 10     | 20  | 380 | 10         | 5 Positive |
|             | s2C SILIS    | 272 | 135   | 2.288  | 1   | 380 | 10         | 5 Positive |
| t6A SILIS   | 434          | 297 | 7.553 | 1      | 380 | 10  | 5 Positive |            |
| mnm5U SILIS | 302          | 165 | 1.491 | 1      | 380 | 10  | 5 Positive |            |

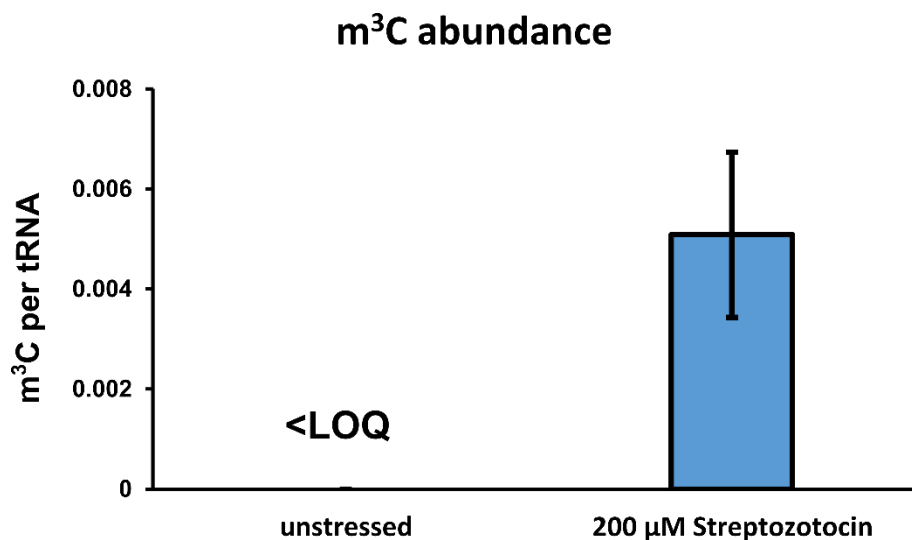

**Supplementary Figure 10:** m<sup>3</sup>C abundance in *E. coli* tRNA after incubation with Streptozotocin (200 μM) for 30 min. The signal for m<sup>3</sup>C in the unstressed samples were below the limit of quantification (LOQ). The experiments were done in biological triplicates and the error bars reflect standard deviation. Source data are provided as a Source Data file.

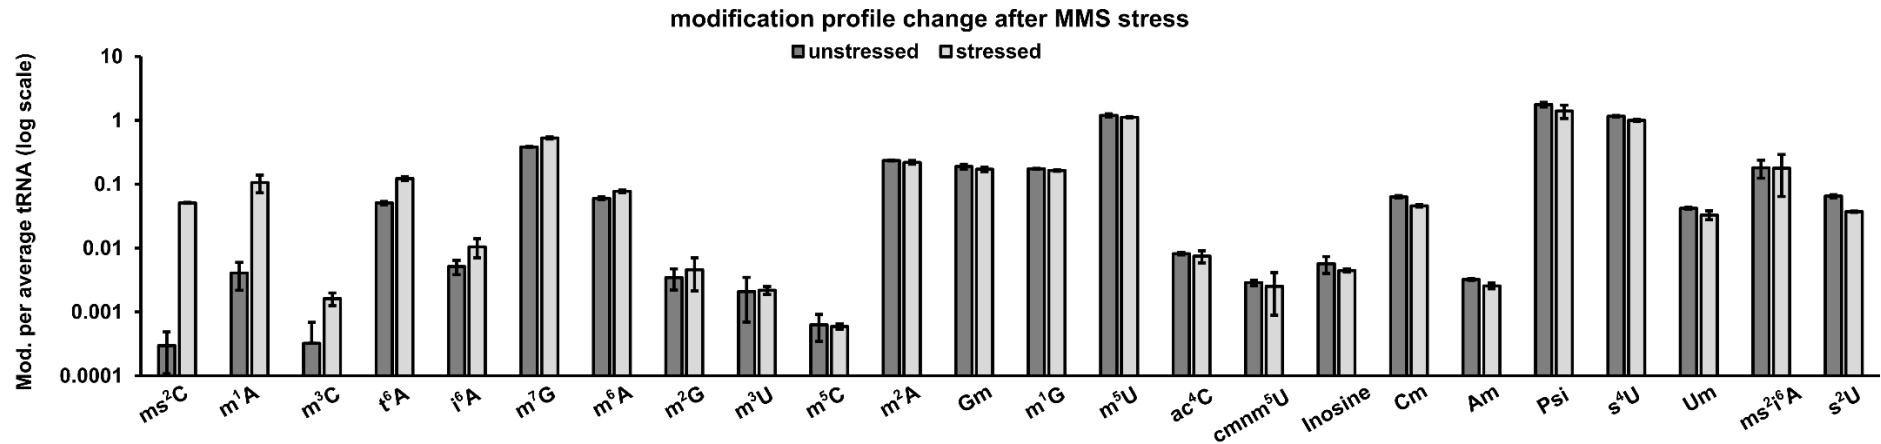

**Supplementary Figure 11:** Absolute abundance of tRNA modifications in *E. coli* after exposure to 20mM MMS. The dark grey bar shows the modification abundance of an unstressed sample whereas the light grey bar shows the modification abundance after one hour of 20mM MMS stress. From n=3 biol. replicates, error bars reflect standard deviation. Source data are provided as a Source Data file.

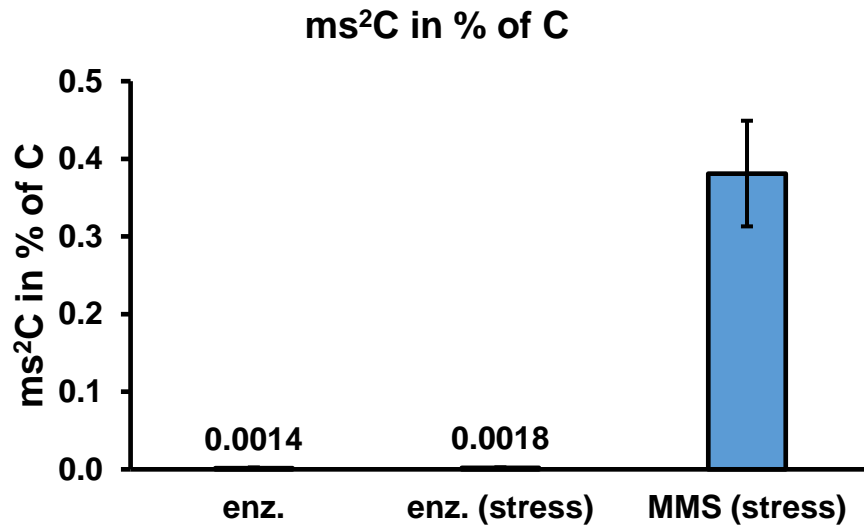

**Supplementary Figure 12:** NAIL-MS discrimination assay to determine origin of ms<sup>2</sup>C *in vivo*. SAM dependent ms<sup>2</sup>C per C in % of tRNA from unstressed bacteria (enz.) and 20 mM MMS stressed bacteria (enz. stressed). On the right, the amount of directly methylated ms<sup>2</sup>C per C in % from 20 mM MMS stressed bacteria is shown. From n=3 biol. replicates, error bars reflect standard deviation. Source data are provided as a Source Data file.

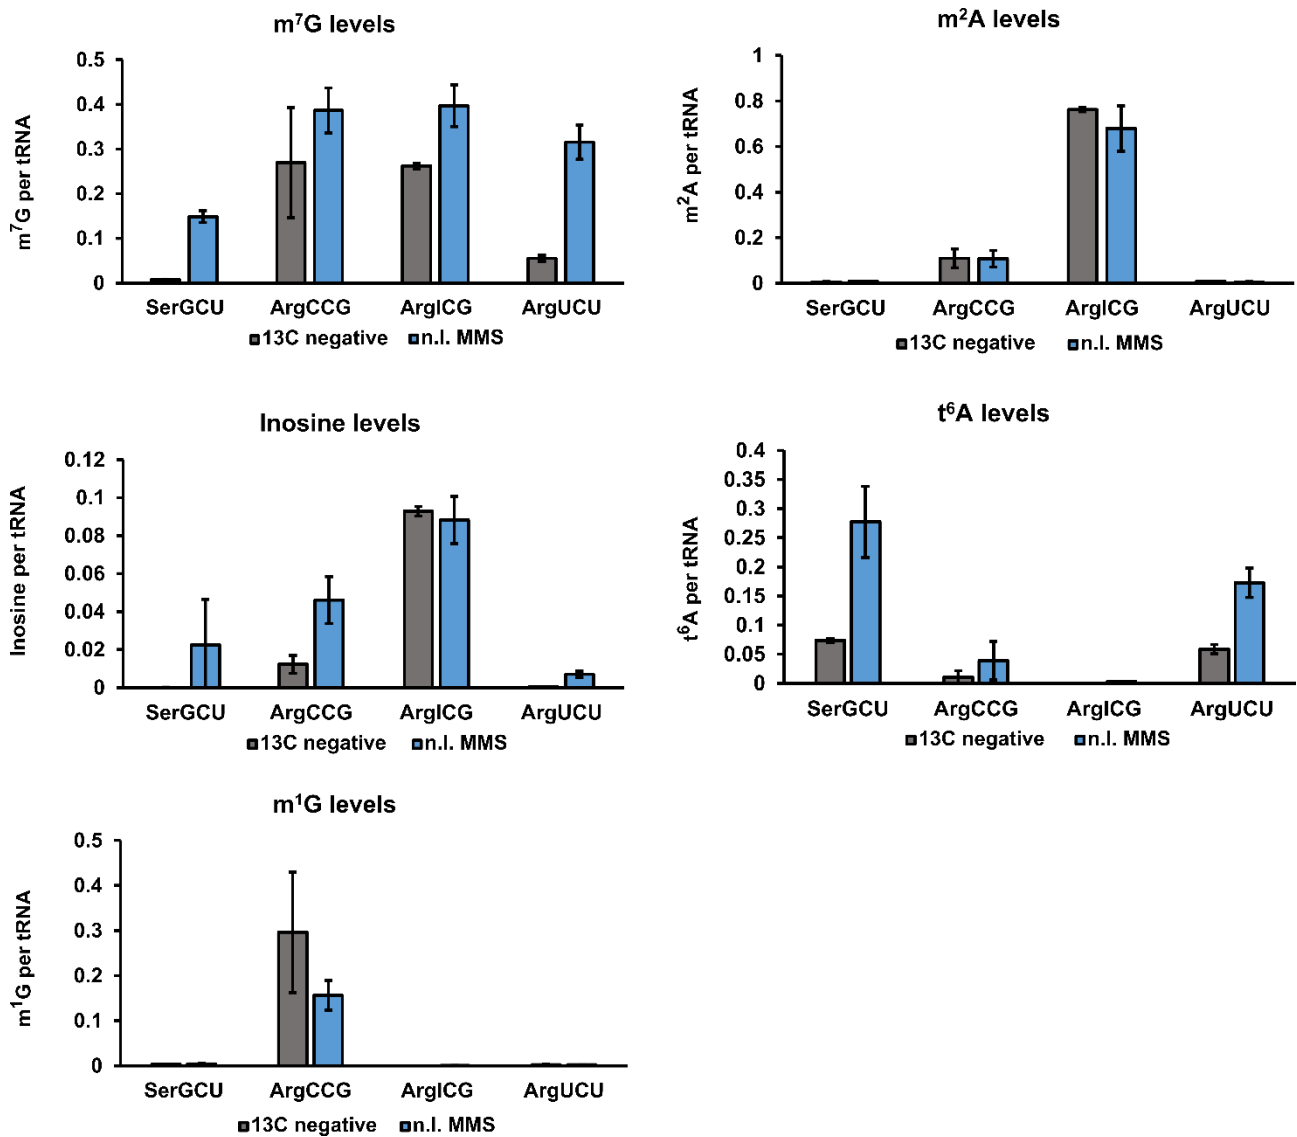

**Supplementary Figure 13:** Modified nucleoside abundance in comparative NAIL-MS experiment for tRNA SerGCU, ArgCCG, ArgICG and ArgUCU. *E. coli* in the negative control (without MMS) were grown in <sup>13</sup>C medium (grey bars, <sup>13</sup>C negative) and the 20mM MMS exposed bacteria in non-labeled (blue bars, n.l. MMS) media. The different samples were unified and the tRNA isoacceptors were co-purified in a comparative NAIL-MS experiment as detailed in the text. All experiments are from n=3 biol. replicates and error bars reflect standard deviation. Source data are provided as a Source Data file. The validation of the comparative NAIL-MS experiment is shown in **Supplementary Figure 14**.





**Supplementary Table 9:** MRM parameters for comparative NAIL-MS analysis.

| Compound Group | Compound Name | Precursor Ion (m/z) | Product Ion (m/z) | Ret Time (min) | Delta Ret Time (min) | Fragmentor (V) | Collision Energy (eV) | Cell Accelerator Voltage (V) | Polarity |
|----------------|---------------|---------------------|-------------------|----------------|----------------------|----------------|-----------------------|------------------------------|----------|
| unlabeled      | C             | 244                 | 112               | 1.73           | 1                    | 175            | 13                    | 5                            | Positive |
|                | U             | 245                 | 113               | 2              | 2                    | 95             | 5                     | 5                            | Positive |
|                | G             | 284                 | 152               | 3.718          | 3                    | 95             | 17                    | 5                            | Positive |
|                | A             | 268                 | 136               | 5.711          | 1                    | 110            | 21                    | 5                            | Positive |
|                | ms2C          | 274                 | 142               | 5.533          | 3                    | 85             | 13                    | 5                            | Positive |
|                | s2C           | 260                 | 128               | 2.288          | 2                    | 85             | 13                    | 5                            | Positive |
|                | m1A           | 282                 | 150               | 1.745          | 2                    | 110            | 21                    | 5                            | Positive |
|                | m7G           | 298                 | 166               | 2.021          | 2                    | 105            | 14                    | 5                            | Positive |
|                | m2A           | 282                 | 150               | 8.08           | 1                    | 125            | 21                    | 5                            | Positive |
|                | l             | 269                 | 137               | 3.556          | 1                    | 100            | 9                     | 5                            | Positive |
|                | t6A           | 413                 | 281               | 7              | 1                    | 130            | 9                     | 5                            | Positive |
| m1G            | 298           | 166                 | 5.08              | 1              | 105                  | 13             | 5                     | Positive                     |          |
| 13C labeled    | C 13C         | 253                 | 116               | 1.73           | 1                    | 175            | 13                    | 5                            | Positive |
|                | U 13C         | 254                 | 117               | 2              | 2                    | 95             | 5                     | 5                            | Positive |
|                | G 13C         | 294                 | 157               | 3.718          | 3                    | 95             | 17                    | 5                            | Positive |
|                | A 13C         | 278                 | 141               | 5.711          | 1                    | 110            | 21                    | 5                            | Positive |
|                | ms2C 13C      | 284                 | 147               | 5.533          | 3                    | 85             | 13                    | 5                            | Positive |
|                | s2C 13C       | 269                 | 132               | 2.288          | 2                    | 85             | 13                    | 5                            | Positive |
|                | m1A 13C       | 293                 | 156               | 1.745          | 2                    | 110            | 21                    | 5                            | Positive |
|                | m7G 13C       | 309                 | 172               | 2.021          | 2                    | 105            | 14                    | 5                            | Positive |
|                | m2A 13C       | 293                 | 156               | 8.08           | 1                    | 125            | 21                    | 5                            | Positive |
|                | l 13C         | 279                 | 142               | 3.556          | 1                    | 100            | 9                     | 5                            | Positive |
|                | t6A 13C       | 428                 | 291               | 7              | 1                    | 130            | 9                     | 5                            | Positive |
| m1G 13C        | 309           | 172                 | 5.08              | 1              | 105                  | 13             | 5                     | Positive                     |          |
| SILIS          | C SILIS       | 256                 | 119               | 1.73           | 1                    | 175            | 13                    | 5                            | Positive |
|                | U SILIS       | 256                 | 119               | 2              | 2                    | 95             | 5                     | 5                            | Positive |
|                | G SILIS       | 299                 | 162               | 3.718          | 3                    | 95             | 17                    | 5                            | Positive |
|                | A SILIS       | 283                 | 146               | 5.711          | 1                    | 110            | 21                    | 5                            | Positive |
|                | ms2C SILIS    | 287                 | 150               | 5.533          | 3                    | 85             | 13                    | 5                            | Positive |
|                | s2C SILIS     | 272                 | 135               | 2.288          | 2                    | 85             | 13                    | 5                            | Positive |
|                | m1A SILIS     | 298                 | 161               | 1.745          | 2                    | 110            | 21                    | 5                            | Positive |
|                | m7G SILIS     | 314                 | 177               | 2.021          | 2                    | 105            | 14                    | 5                            | Positive |
|                | m2A SILIS     | 298                 | 161               | 8.08           | 1                    | 125            | 21                    | 5                            | Positive |
|                | l SILIS       | 283                 | 146               | 3.556          | 1                    | 100            | 9                     | 5                            | Positive |
|                | t6A SILIS     | 434                 | 297               | 7              | 1                    | 130            | 9                     | 5                            | Positive |
| m1G SILIS      | 314           | 177                 | 5.08              | 1              | 105                  | 13             | 5                     | Positive                     |          |

**Supplementary Table 10:** Primers used for the generation of sfGFP constructs used in this study

|                     |                                                                                                   |
|---------------------|---------------------------------------------------------------------------------------------------|
| gfp_for             | CGGAATTCCGCATGAGCAAAGGAGAAGAAGAACTTTTCACTGGAG                                                     |
| gfp_for_AGT         | CGGAATTCCGCATGAGTAAAGGAGAAGAAGAACTTTTCACTGGAG                                                     |
| PAS-gfp_for         | CGGAATTCCGCATGAGCCCAGCTGCACCTAGCGCTAGCGCAGCAAGCGCACCTAGCGCAGCTA<br>GCAAAGGAGAAGAAGAACTTTTCACTGGAG |
| PAS-<br>ACT_gfp_for | CGGAATTCCGCATGAGTCCAGCTGCACCTAGTGTAGTGCAGCAAGTGCACCTAGTGCAGCTAG<br>TAAAGGAGAAGAAGAACTTTTCACTGGAG  |
| gfp_for_TCC         | CGGAATTCCGCATGTCCAAAGGAGAAGAAGAACTTTTCACTGGAG                                                     |
| PAS-<br>gfp_for_TCC | CGGAATTCCGCATGTCCCAGCTGCACCTTCCGCTTCCGCAGCATCCGCACCTTCCGCAGCTTCC<br>AAAGGAGAAGAAGAACTTTTCACTGGAG  |
| gfp_rev             | GCTCTAGACTTATTTGTAGAGCTCATCCATGCCATGTG                                                            |

**Full *sfgfp* sequence:**

5'AGCAAAGGAGAAGAAGAACTTTTCACTGGAGTTGTCCCAATTCTTGTGTAATTAGATGGTGATGTTAATGGGCACAAATT  
TTCTGTCCGTGGAGAGGGTGAAGGTGATGCTACAAACGGAAAACCTACCCTTAAATTTATTTGCACTACTGGAAAAC  
ACCTGTTCCGTGGCCAACACTTGTCACTACTCTGACCTATGGTGTTCATGCTTTTCCCGTTATCCGGATCACATGAAAC  
GGCATGACTTTTTCAAGAGTGCCATGCCCGAAGGTTATGTACAGGAACGCACTATATCTTTCAAAGATGACGGGACCT  
ACAAGACGCGTGCTGAAGTCAAGTTTGAAGGTGATACCCTTGTTAATCGTATCGAGTTAAAGGATATTGATTTAAAG  
AAGATGGAAACATTCTTGACACAAACTCGAGTACAACCTTAACTCACACAATGTATACATCACGGCAGACAAACAAA  
AGAATGGAATCAAAGCTAACTTCAAATTCGCCACAACGTTGAAGATGGTCCGTTCACTAGCAGACCATTATCAAC  
AAAATACTCCAATTGGCGATGGCCCTGTCTTTTACCAGACAACCATTACCTGTGACACAATCTGTCTTTTCGAAAGA  
TCCAACGAAAAGCGTGACCACATGGTCCTTCTTGAGTTTGTAACTGCTGCTGGGATTACACATGGCATGGATGAGCT  
CTACAAATAA-3'

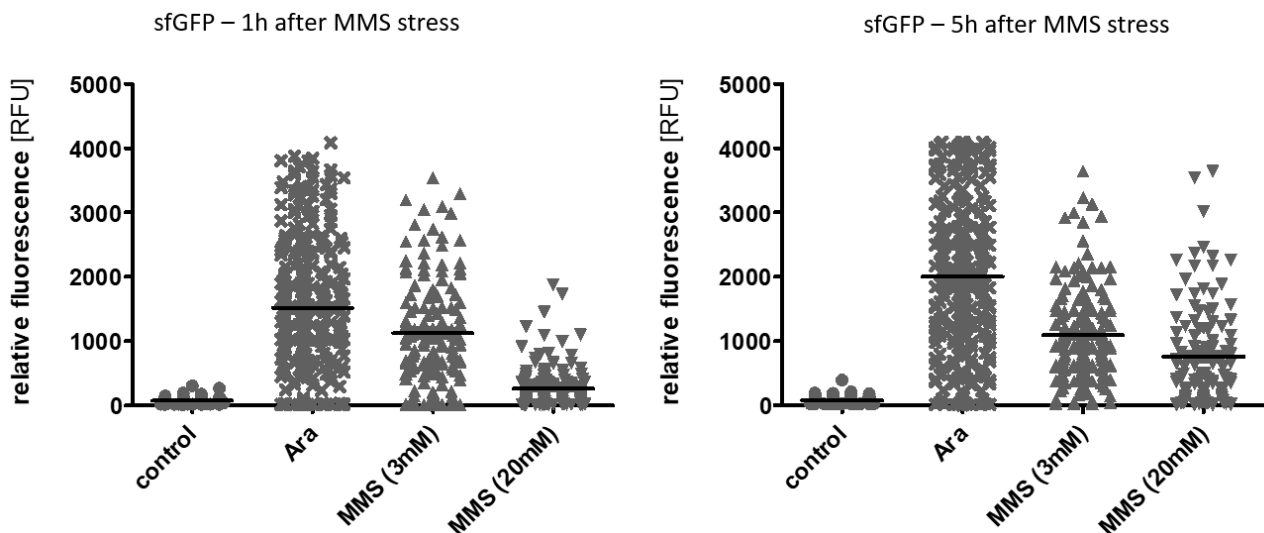

**Supplementary Figure 15:** Effects of 20 mM or 3 mM MMS stress on sfGFP synthesis in *E. coli* BW25113 cells. Results of single-cell fluorescence microscopy of *E. coli* cells producing sfGFP from the arabinose inducible plasmid pBAD24. Fluorescence was measured 1h or 5h after induction with 0.2% arabinose of non-stressed cells or cells pre-exposed to 20mM or 3 mM MMS stress for 1h. As a control cells were incubated in absence of MMS and arabinose. Black line represents the mean value. Source data are provided as a Source Data file.

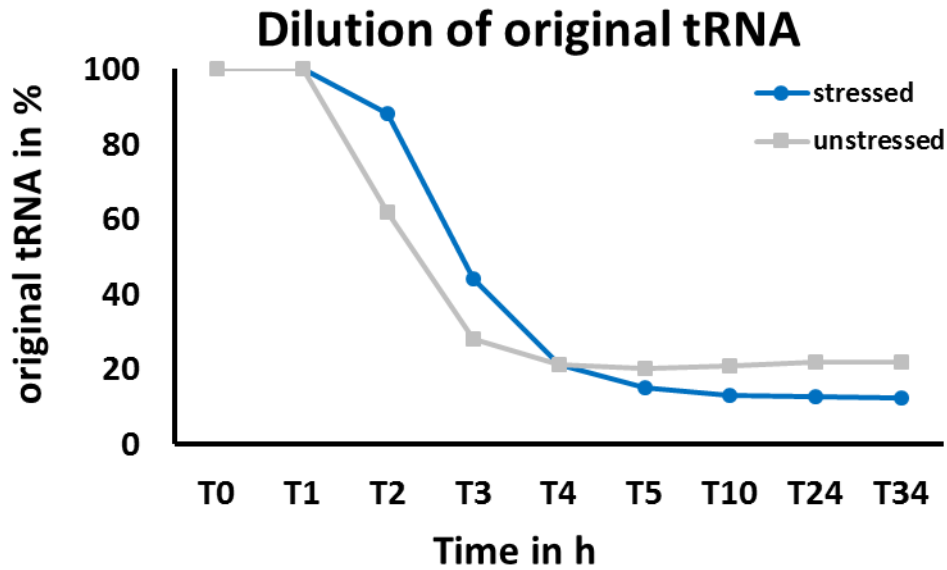

**Supplementary Figure 16:** RNA dilution curve for total RNA. Comparison of the proportional decrease of original tRNA in comparison to freshly transcribed tRNA during the pulse chase NAIL-MS experiment. The ratio of original (unlabeled canonicals determined by LC-MS) to newly transcribed tRNA (nitrogen-15 labeled canonicals determined by LC-MS) is shown in % original tRNA. blue: from MMS stressed bacteria, grey: from unstressed control bacteria. Mean of n=3 biol. replicates. Source data are provided as a Source Data file.

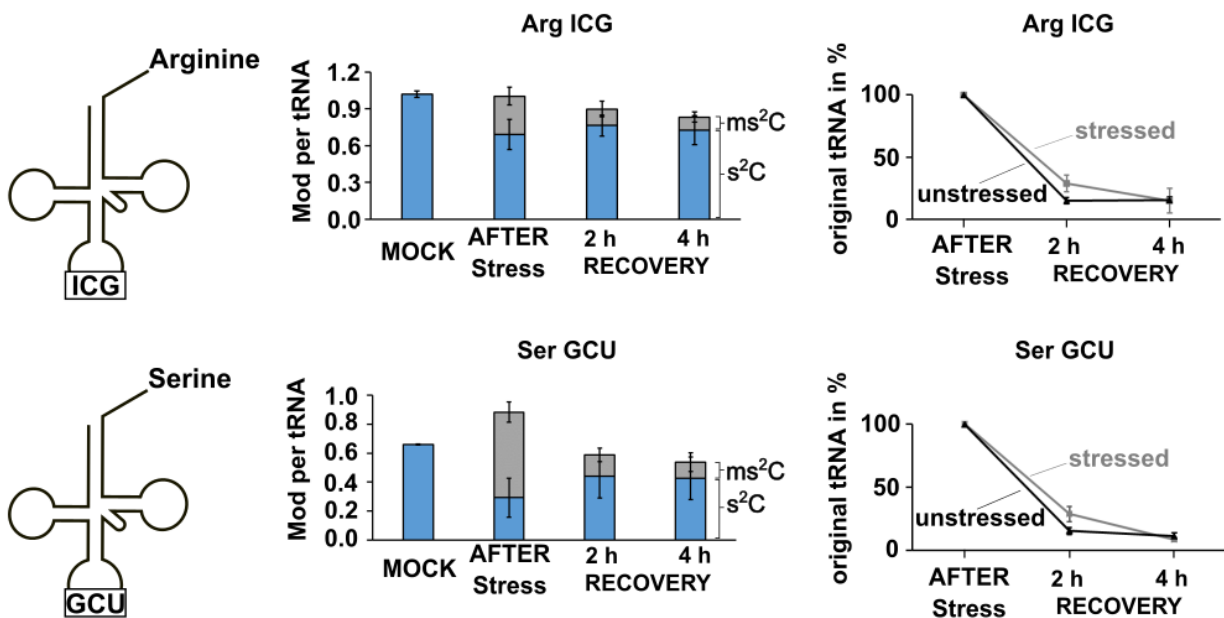

**Supplementary Figure 17:** Abundance of s<sup>2</sup>C (blue) and ms<sup>2</sup>C (grey) in tRNA<sup>Arg</sup><sub>ICG</sub> (top) and tRNA<sup>Ser</sup><sub>GCU</sub> (bottom) present during the 20 mM MMS exposure. The bar diagrams show the abundance of the modified nucleosides in original tRNA from a pulse-chase NAIL-MS experiment after 1 h of MMS exposure, and after 2 and 4 hours of recovery. MOCK indicates tRNA from unstressed bacteria. On the right side, the ratio of original to newly transcribed tRNA is shown in % original tRNA. grey: from MMS stressed bacteria, black: from unstressed control bacteria. The isoacceptors were purified from n=3 biol. replicates and error bars reflect standard deviation. Source data are provided as a Source Data file.

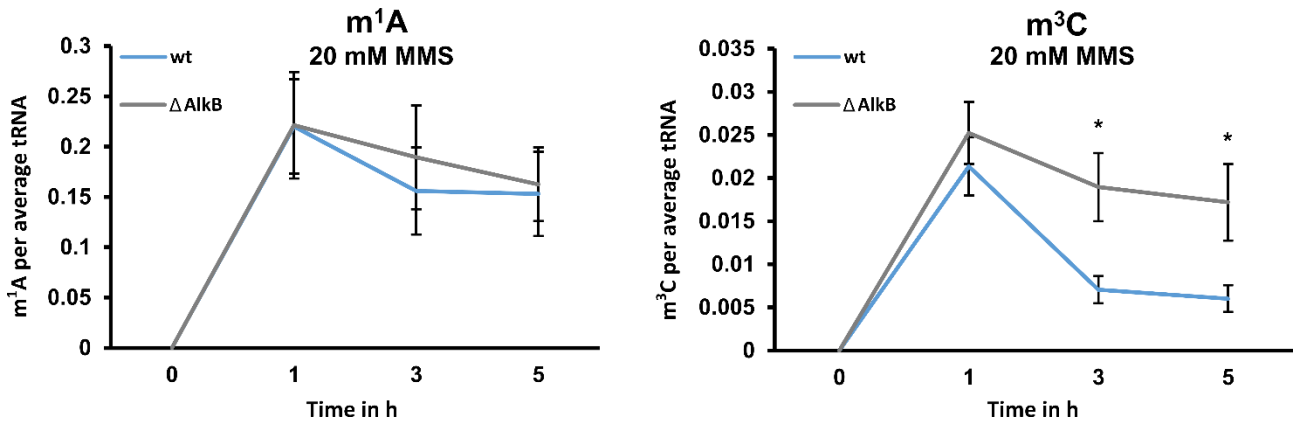

**Supplementary Figure 18:** Absolute abundance of m<sup>1</sup>A and m<sup>3</sup>C in wildtype and  $\Delta alkB$  *E. coli*. Here, the abundance of m<sup>1</sup>A and m<sup>3</sup>C in original tRNA (distinguished from new transcripts by pulse-chase NAIL-MS as described in **Figure 4a**) in wildtype (wt, light blue) and AlkB deficient *E. coli* ( $\Delta alkB$ , grey) is shown. The bacteria are exposed to 20 mM MMS and harvested directly after the stress (1 h) and after 2 and 4 hours of recovery (3 h, 5 h). All experiments are from n=3 biol. replicates and error bars reflect standard deviation. The statistics were done with student t-test (equal distribution, two-sided): \* p < 0.05. Source data are provided as a Source Data file.

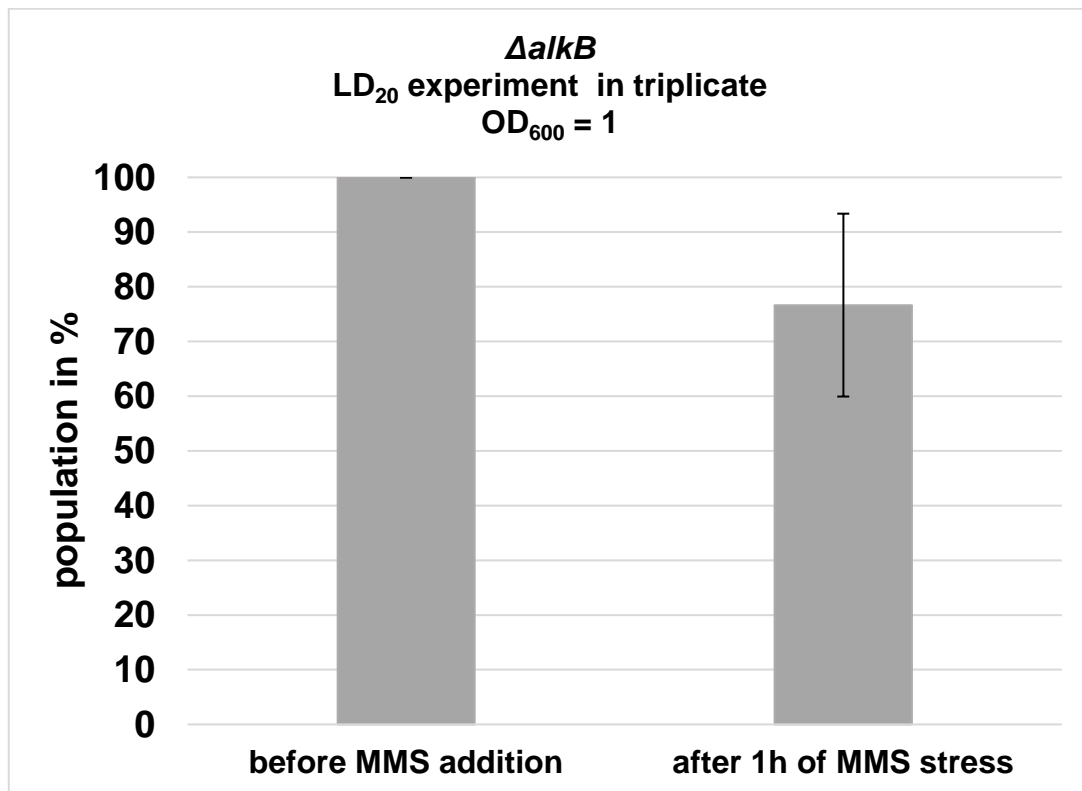

**Supplementary Figure 19:** Survival assay to determine the lethality of 3mM MMS for the *E. coli*  $\Delta alkB$  strain. Cells were brought to an OD of 1 (error bars reflect the standard deviation of n=3 biol. replicates) and exposed to 3 mM MMS for 60 min.

**Supplementary Table 11:** MRM parameters for pulse chase NAIL-MS experiments.

| Compound Group            | Compound Name    | Precursor Ion (m/z) | Product Ion (m/z) | Ret Time (min) | Delta Ret Time (min) | Fragmentor (V) | Collision Energy (eV) | Cell Accelerator Voltage (V) | Polarity |
|---------------------------|------------------|---------------------|-------------------|----------------|----------------------|----------------|-----------------------|------------------------------|----------|
| unlabeled (original)      | C                | 244                 | 112               | 1.73           | 1                    | 175            | 13                    | 5                            | Positive |
|                           | U                | 245                 | 113               | 2              | 2                    | 95             | 5                     | 5                            | Positive |
|                           | G                | 284                 | 152               | 3.718          | 3                    | 95             | 17                    | 5                            | Positive |
|                           | A                | 268                 | 136               | 5.711          | 1                    | 110            | 21                    | 5                            | Positive |
|                           | ms2C             | 274                 | 142               | 5.533          | 3                    | 85             | 13                    | 5                            | Positive |
|                           | s2C              | 260                 | 128               | 2.288          | 2                    | 85             | 13                    | 5                            | Positive |
|                           | m1A              | 282                 | 150               | 1.745          | 2                    | 110            | 21                    | 5                            | Positive |
|                           | m3C              | 258                 | 126               | 1.752          | 2                    | 88             | 14                    | 5                            | Positive |
|                           | I                | 269                 | 137               | 3.272          | 2                    | 100            | 9                     | 5                            | Positive |
|                           | m5U              | 259                 | 127               | 3.61           | 2                    | 145            | 10                    | 5                            | Positive |
|                           | m2A              | 282                 | 150               | 7.85           | 3                    | 120            | 20                    | 5                            | Positive |
|                           | m7G              | 298                 | 166               | 2.7            | 2                    | 105            | 14                    | 5                            | Positive |
|                           | t6A              | 413                 | 281               | 6.923          | 2                    | 130            | 9                     | 5                            | Positive |
| 15N/CD3/34S labeled (new) | C 15N            | 247                 | 115               | 1.73           | 1                    | 175            | 13                    | 5                            | Positive |
|                           | U 15N            | 247                 | 115               | 1.876          | 2                    | 95             | 5                     | 5                            | Positive |
|                           | G 15N            | 289                 | 157               | 3.718          | 3                    | 95             | 17                    | 5                            | Positive |
|                           | A 15N            | 273                 | 141               | 5.711          | 1                    | 110            | 21                    | 5                            | Positive |
|                           | ms2C 34S_CD3_15N | 282                 | 150               | 5.533          | 3                    | 85             | 13                    | 5                            | Positive |
|                           | s2C 34S_15N      | 265                 | 133               | 2.288          | 2                    | 85             | 13                    | 5                            | Positive |
|                           | m1A 15N_CD3      | 290                 | 158               | 1.745          | 2                    | 110            | 21                    | 5                            | Positive |
|                           | m3C 15N_CD3      | 264                 | 132               | 1.752          | 2                    | 88             | 14                    | 5                            | Positive |
|                           | I 15N            | 273                 | 141               | 3.272          | 2                    | 100            | 9                     | 5                            | Positive |
|                           | m5U 15N_CD3      | 264                 | 132               | 3.61           | 2                    | 145            | 10                    | 5                            | Positive |
|                           | m2A 15N_CD3      | 290                 | 158               | 7.85           | 3                    | 120            | 20                    | 5                            | Positive |
|                           | m7G 15N_CD3      | 306                 | 174               | 2.7            | 2                    | 105            | 14                    | 5                            | Positive |
|                           | t6A 15N          | 419                 | 287               | 6.923          | 2                    | 130            | 9                     | 5                            | Positive |
| 34S labeled (turnover)    | ms2C 34S         | 276                 | 144               | 5.533          | 3                    | 85             | 13                    | 5                            | Positive |
|                           | s2C 34S          | 262                 | 130               | 2.288          | 2                    | 85             | 13                    | 5                            | Positive |
| SILIS                     | C SILIS          | 256                 | 119               | 1.73           | 1                    | 175            | 13                    | 5                            | Positive |
|                           | U SILIS          | 256                 | 119               | 1.876          | 2                    | 95             | 5                     | 5                            | Positive |
|                           | G SILIS          | 299                 | 162               | 3.718          | 3                    | 95             | 17                    | 5                            | Positive |
|                           | A SILIS          | 283                 | 146               | 5.711          | 1                    | 110            | 21                    | 5                            | Positive |
|                           | ms2C SILIS       | 287                 | 150               | 5.533          | 3                    | 85             | 13                    | 5                            | Positive |
|                           | s2C SILIS        | 272                 | 135               | 2.288          | 2                    | 85             | 13                    | 5                            | Positive |
|                           | m1A SILIS        | 298                 | 161               | 1.745          | 2                    | 110            | 21                    | 5                            | Positive |
|                           | m3C SILIS        | 271                 | 134               | 1.752          | 2                    | 88             | 14                    | 5                            | Positive |
|                           | I SILIS          | 283                 | 146               | 3.272          | 2                    | 100            | 9                     | 5                            | Positive |
|                           | m5U SILIS        | 271                 | 134               | 3.61           | 2                    | 145            | 10                    | 5                            | Positive |
|                           | m2A SILIS        | 298                 | 161               | 7.85           | 3                    | 120            | 20                    | 5                            | Positive |
|                           | m7G SILIS        | 314                 | 177               | 2.7            | 2                    | 105            | 14                    | 5                            | Positive |
|                           | t6A SILIS        | 434                 | 297               | 6.923          | 2                    | 130            | 9                     | 5                            | Positive |

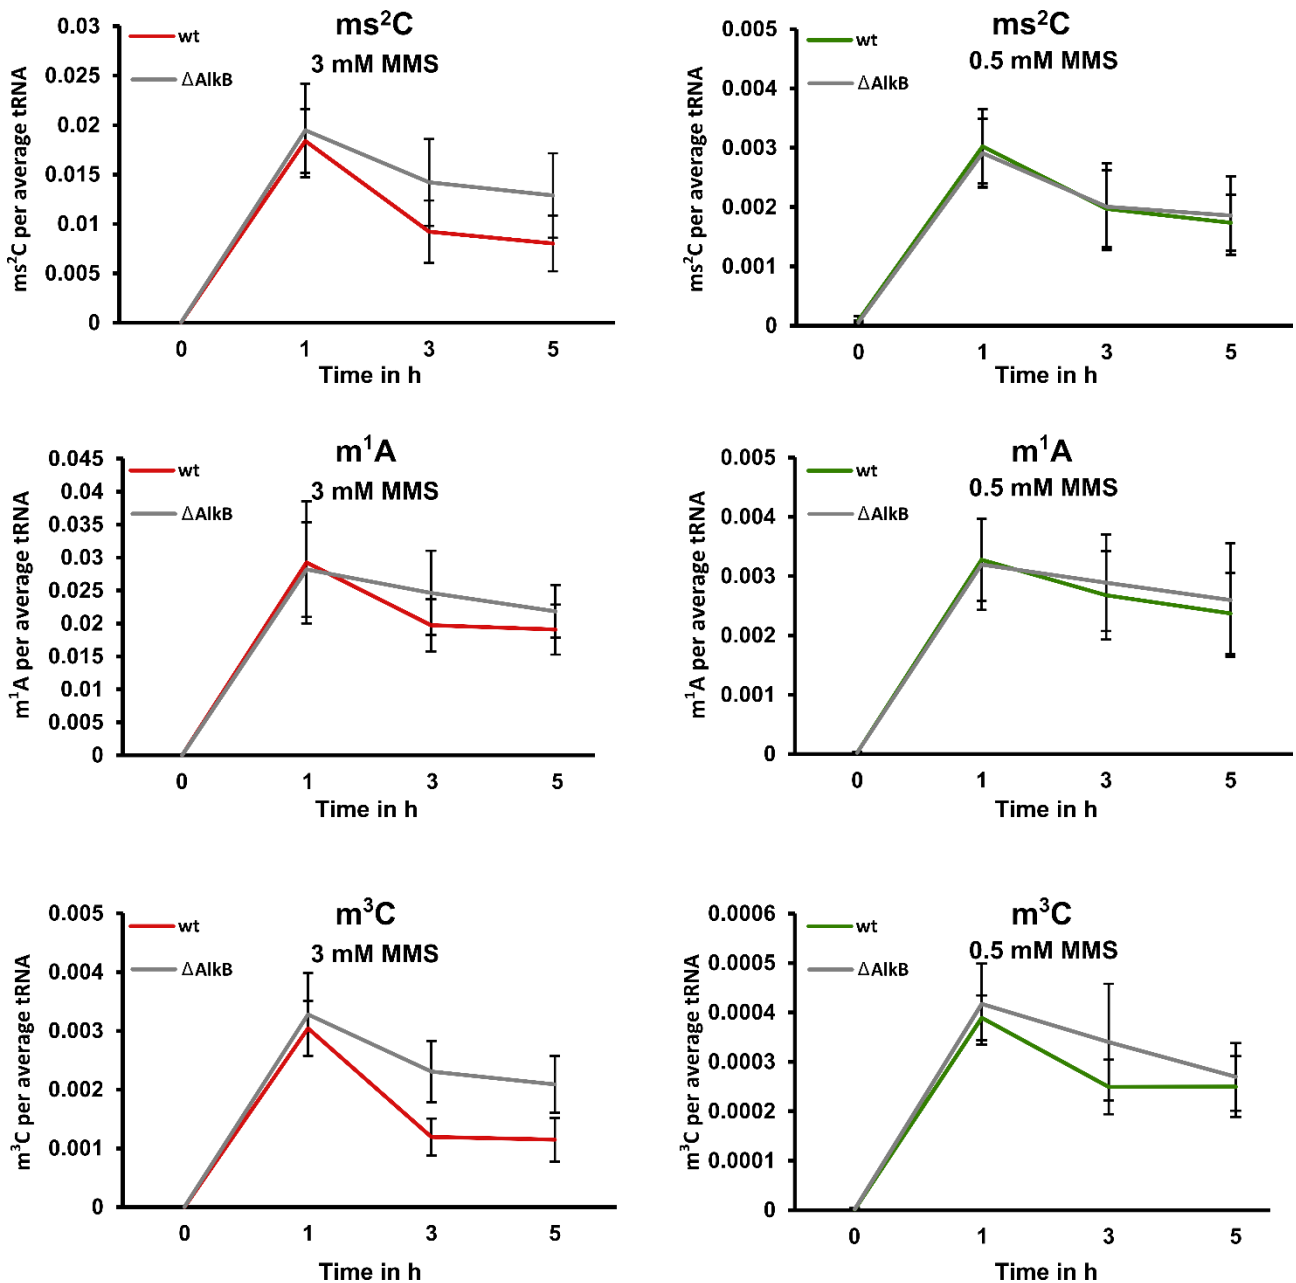

**Supplementary Figure 20:** Absolute abundance of  $ms^2C$ ,  $m^1A$  and  $m^3C$  at different MMS concentrations in WT and  $\Delta alkB$  *E. coli*. The experimental set up as described in **Figure 4a** was used to investigate the stress behavior at lower MMS concentrations (3mM and 0.5 mM). The bacteria are exposed to MMS and are harvested directly after the stress (1 h) and after 2 and 4 hours of recovery (3 h, 5 h). All experiments are from n=3 biol. replicates and error bars reflect standard deviation. Source data are provided as a Source Data file.

### ms<sup>2</sup>C in unstressed dynamic NAIL-MS

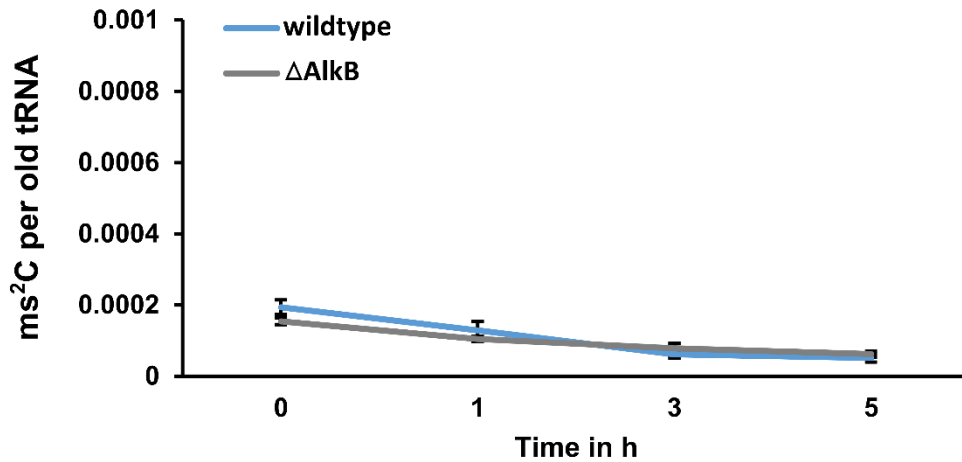

**Supplementary Figure 21:** Pulse chase control experiment with unstressed *E. coli* WT compared to unstressed  $\Delta alkB$  knockout cells. ms<sup>2</sup>C was not observed to accumulate in the  $\Delta alkB$  knockout. The experimental set up is shown in **Figure 4a** in the manuscript. Experiments were done in biological triplicates and error bars reflect standard deviation. Source data are provided as a Source Data file.

**Supplementary Table 12:** Formula for absolute quantification of unmodified and modified nucleosides from LC-MS/MS signals (area) of a NAIL-MS Pulse Chase experiment and subsequent reference of the modifications to the respective canonicals. As an example, here we chose 2-thiocytidine which was referenced to its canonical nucleoside, cytidine.

|                 | s <sup>2</sup> C (fmol)                                                                  | C (fmol)                                                                       | Normalization                                       |
|-----------------|------------------------------------------------------------------------------------------|--------------------------------------------------------------------------------|-----------------------------------------------------|
| (1)<br>original | $\frac{\text{area s2C (unlabeled)}}{\text{rRFN s2C} \times \text{area s2C (SILIS)}}$     | $\frac{\text{area C (unlabeled)}}{\text{rRFN C} \times \text{area C (SILIS)}}$ | $\frac{\text{s2C (original)}}{\text{C (original)}}$ |
| (2)<br>new      | $\frac{\text{area s2C (34S, 15N, CD3)}}{\text{rRFN s2C} \times \text{area s2C (SILIS)}}$ | $\frac{\text{area C (15N)}}{\text{rRFN C} \times \text{area C (SILIS)}}$       | $\frac{\text{s2C (new)}}{\text{C (new)}}$           |



**Supplementary References**

- 1 Baba, T. *et al.* Construction of Escherichia coli K-12 in-frame, single-gene knockout mutants: the Keio collection. *Molecular systems biology* **2**, 2006.0008, doi:10.1038/msb4100050 (2006).
- 2 Boccaletto, P. *et al.* MODOMICS: a database of RNA modification pathways. 2017 update. *Nucleic acids research* **46**, D303-d307, doi:10.1093/nar/gkx1030 (2018).
- 3 Kitagawa, M. *et al.* Complete set of ORF clones of Escherichia coli ASKA library (a complete set of E. coli K-12 ORF archive): unique resources for biological research. *DNA research : an international journal for rapid publication of reports on genes and genomes* **12**, 291-299, doi:10.1093/dnares/dsi012 (2005).
- 4 Reichle, V. F. *et al.* Surpassing limits of static RNA modification analysis with dynamic NAIL-MS. *Methods (San Diego, Calif.)* **156**, 91-101, doi:10.1016/j.ymeth.2018.10.025 (2019).
